# Supplementary material for: Modeled storm surge changes in a warmer world: the Last Interglacial
Source: Copernicus journal article supplement (doi:10.5194/cp-19-141-2023), 2023-01-16
Supplement: Supplementary file 1 [file cp-19-141-2023-supplement.pdf]

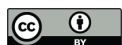

*Supplement of*

## **Modeled storm surge changes in a warmer world: the Last Interglacial**

**Paolo Scussolini et al.**

*Correspondence to:* Paolo Scussolini ([paolo.scussolini@vu.nl](mailto:paolo.scussolini@vu.nl))

The copyright of individual parts of the supplement might differ from the article licence.

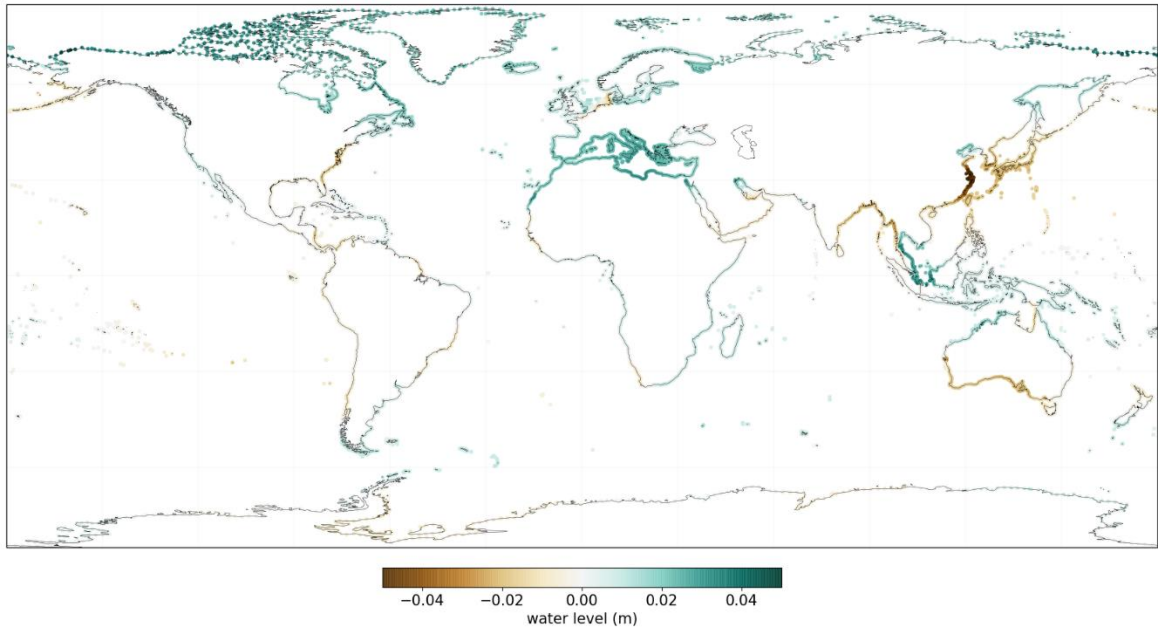

**Figure S1. Anomaly in climatological mean of sea level, Last Interglacial minus pre-industrial values.**

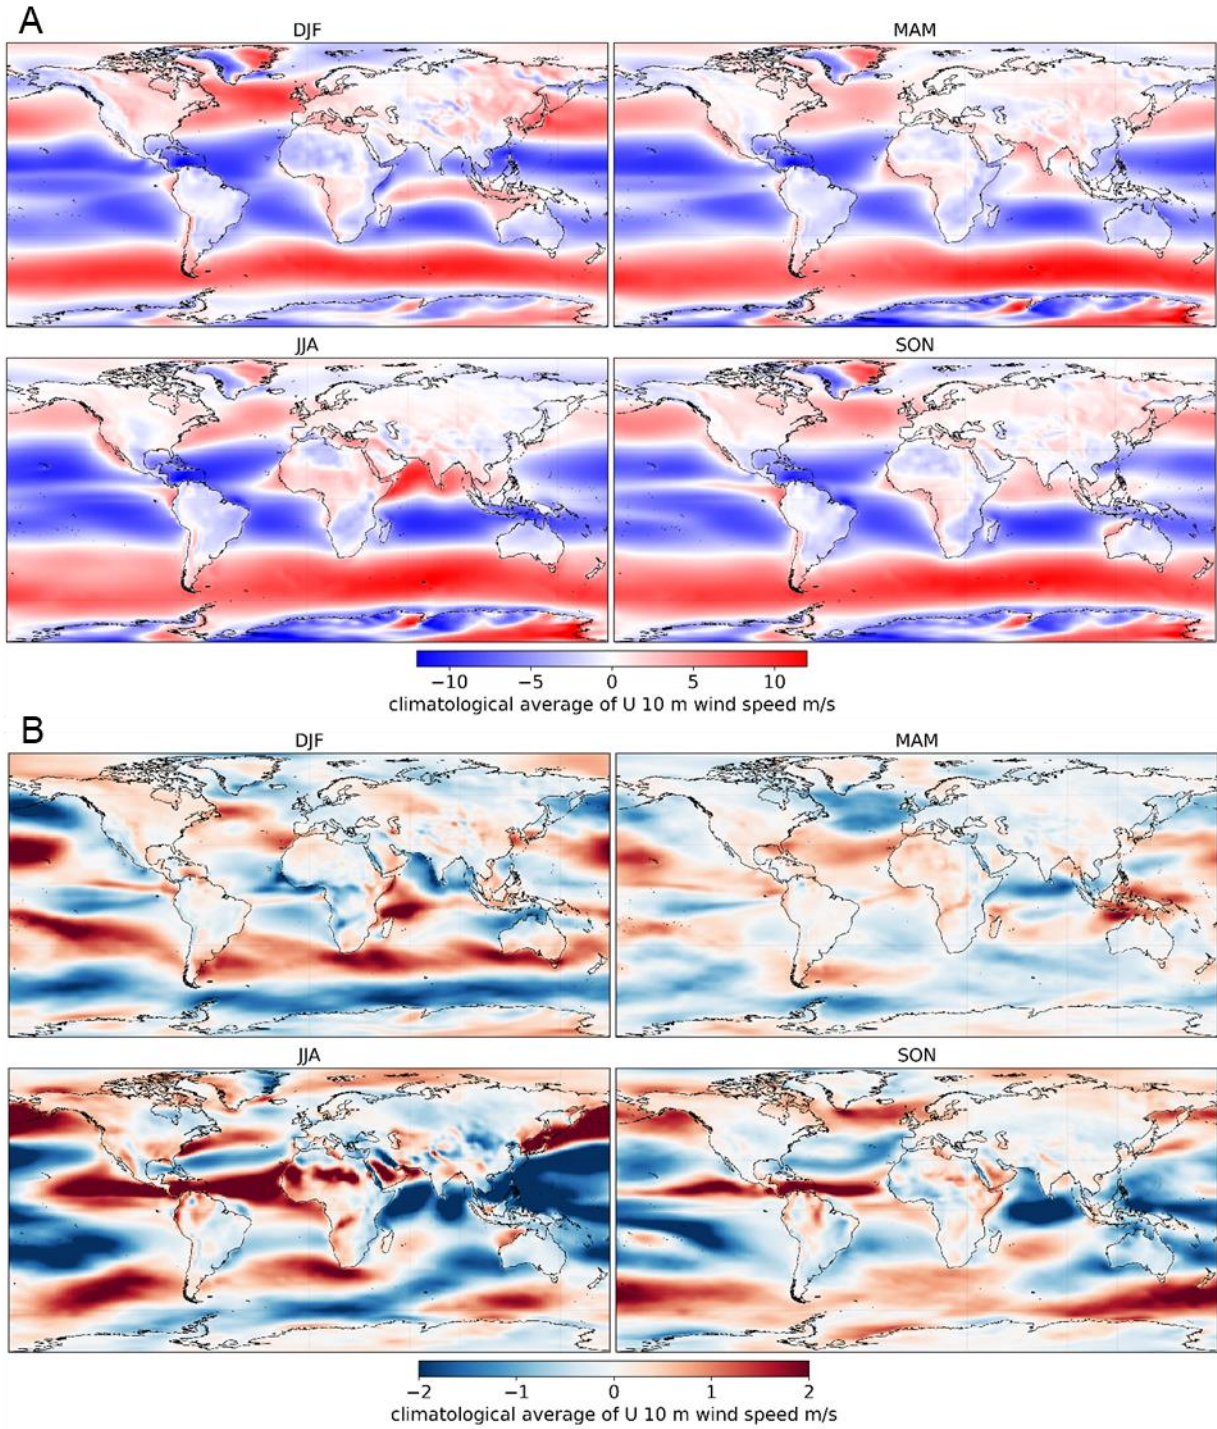

Figure S2. Zonal wind speed at 10 m elevation ( $u_{10\text{ m}}$ ). A) pre-industrial values; and B) LIG-PI anomalies.



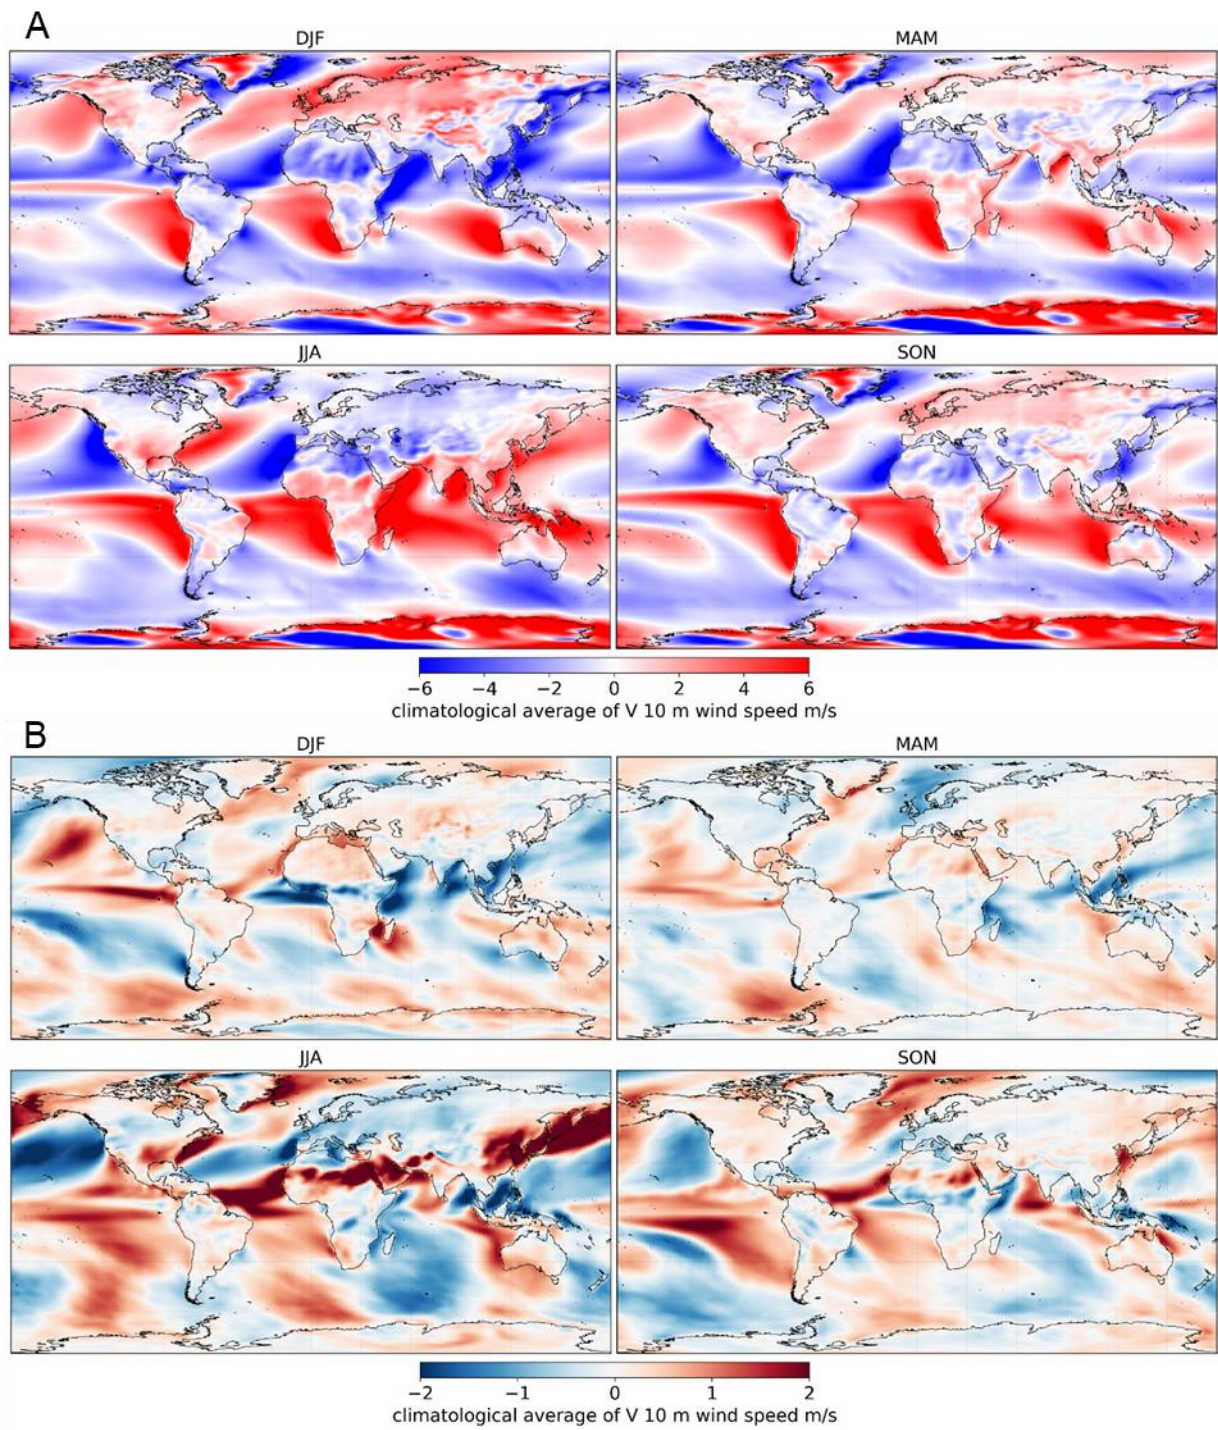

**Figure S3. Meridional wind speed at 10 m elevation ( $v_{10\text{ m}}$ ). A) pre-industrial values; and B) LIG-PI anomalies.**

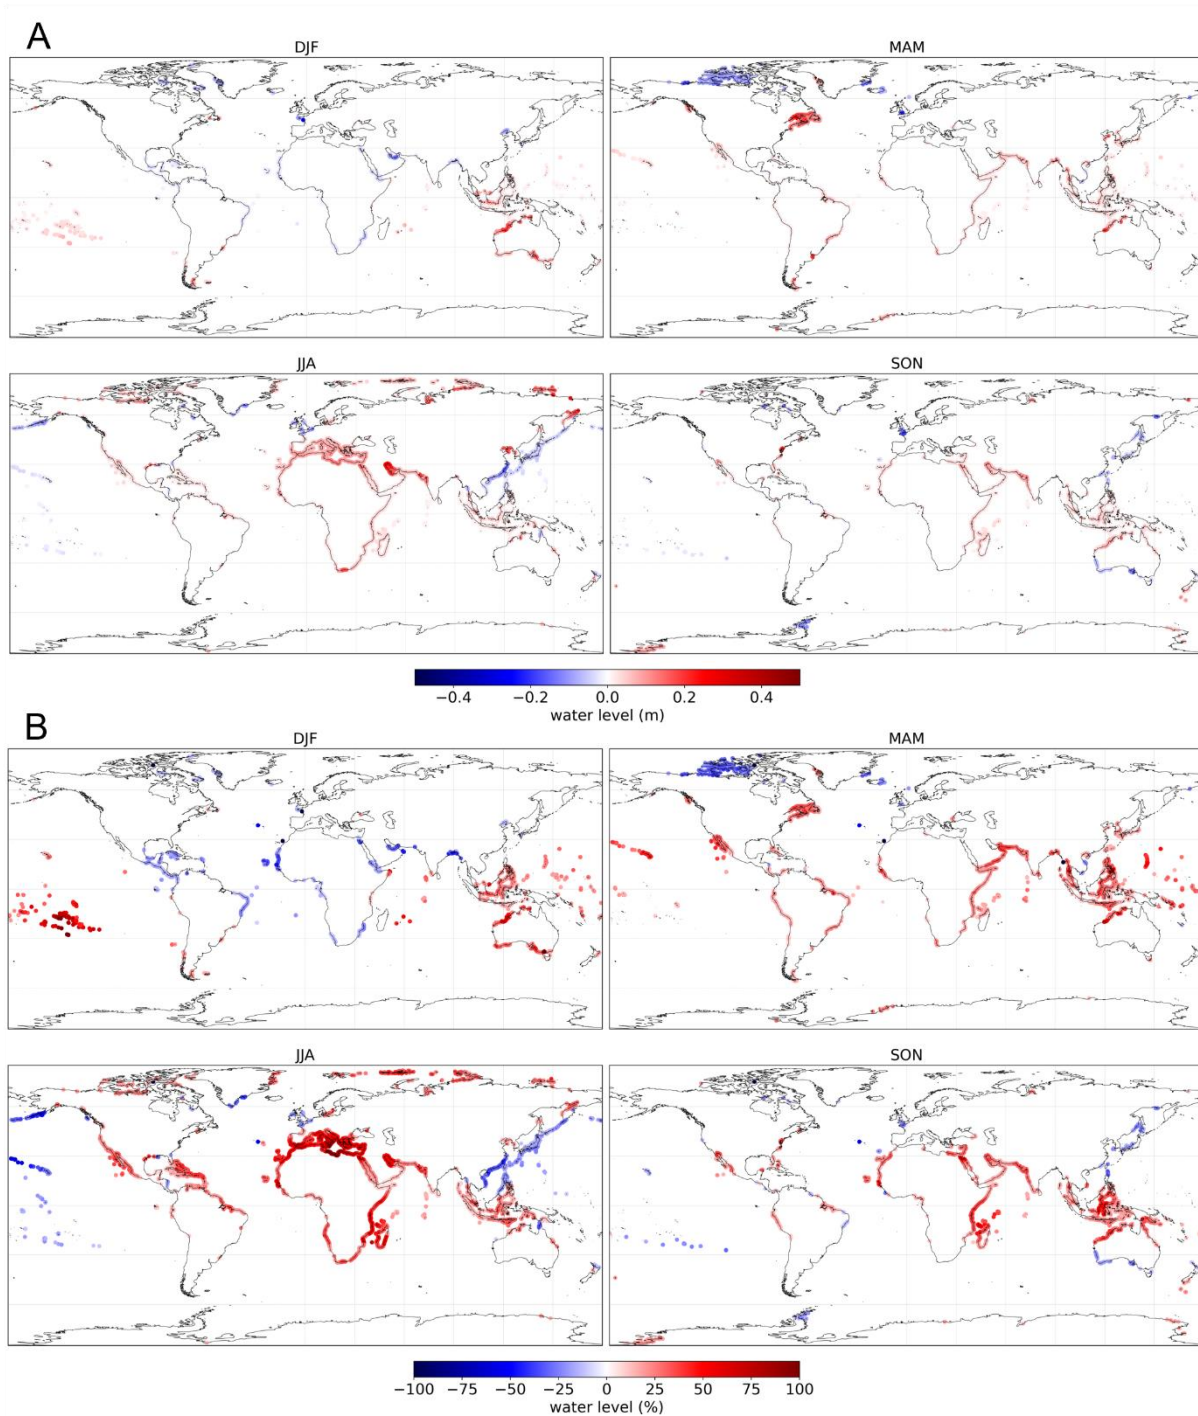

**Figure S4. Anomalies (LIG-PI) in sea level extremes at the 2-year return period, as A) absolute, and B) percentage values. Only values for which the 95% uncertainty bands of the distributions of each climate do not overlap.**



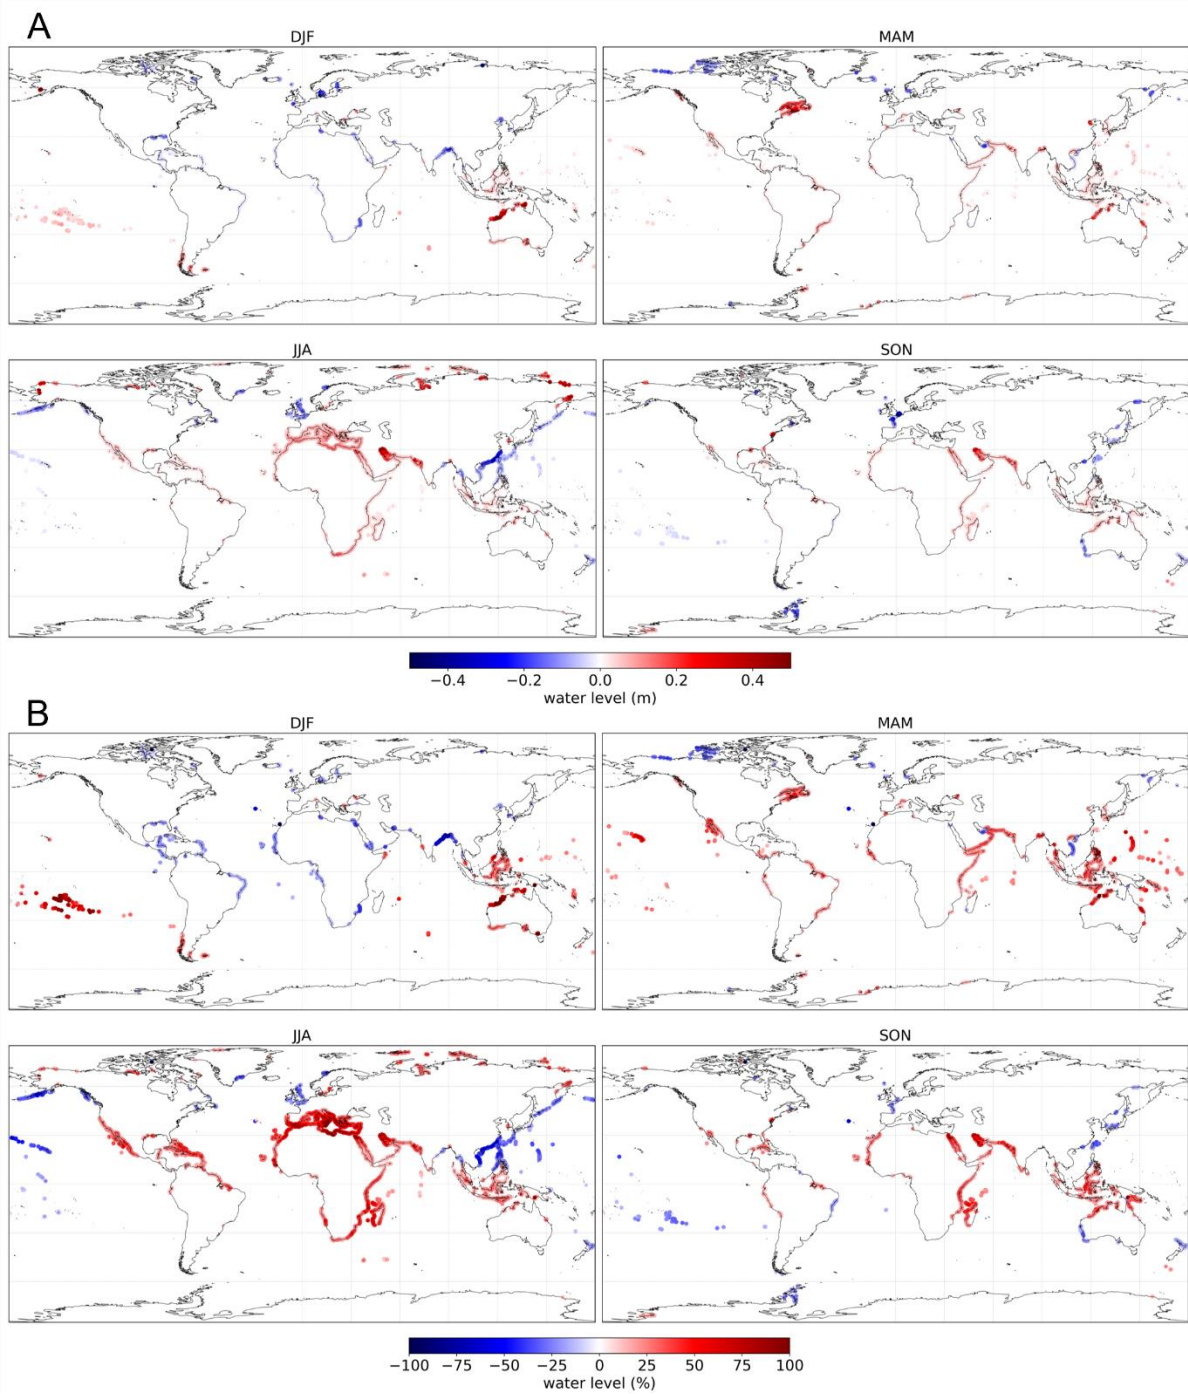

**Figure S5. Same as Fig. S4, but for sea level extremes at the 5-year return period.**

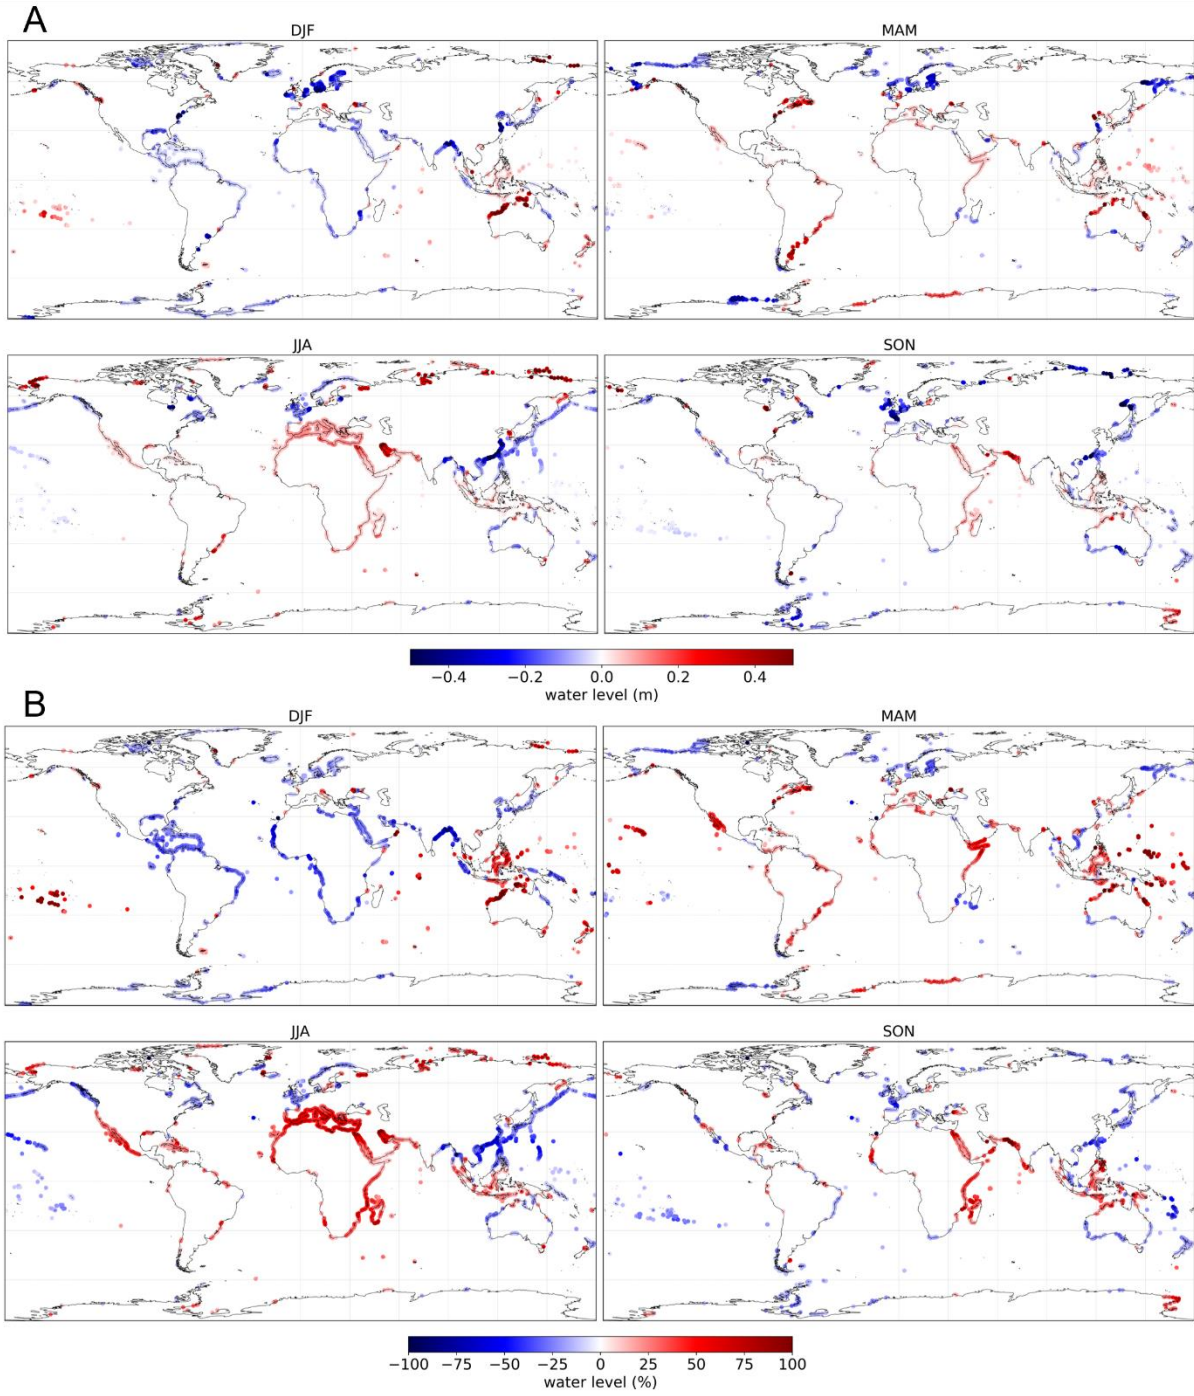

**Fig. S6.** Same as Fig. S4, but for sea level extremes at the 20-year return period.

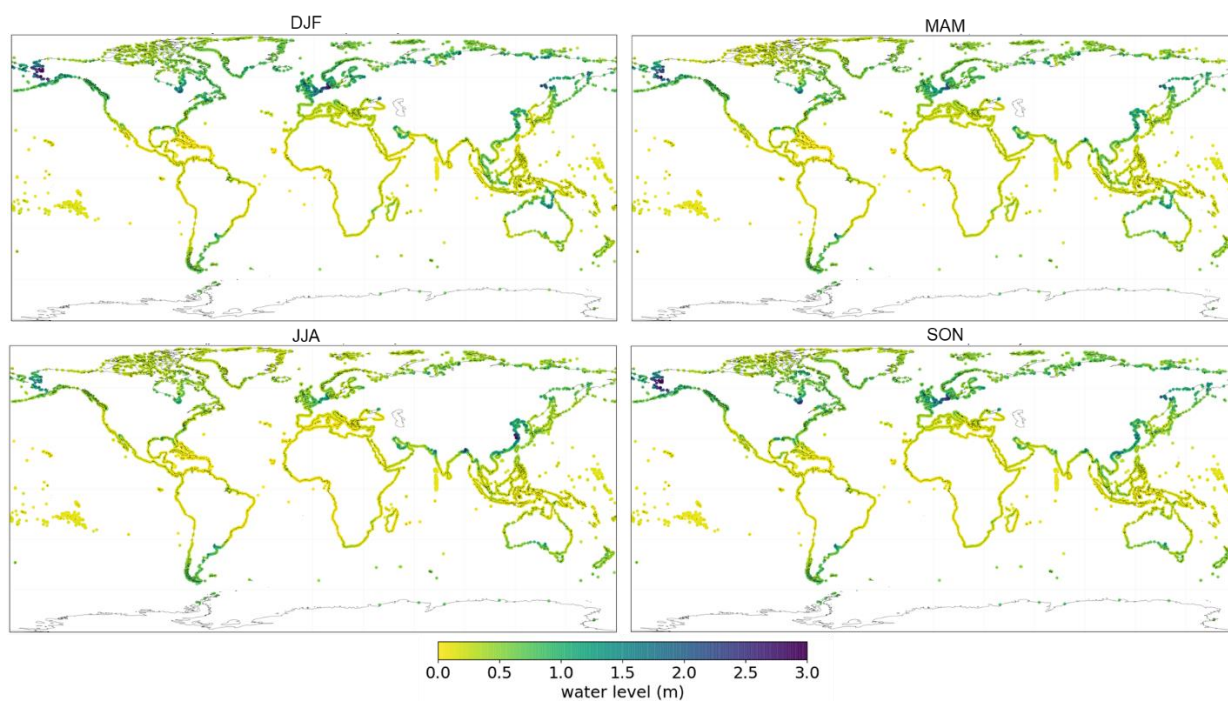

**Fig. S7. Modern sea level extremes at the 10-year return period (data from GTSR, Muis et al. 2016).**

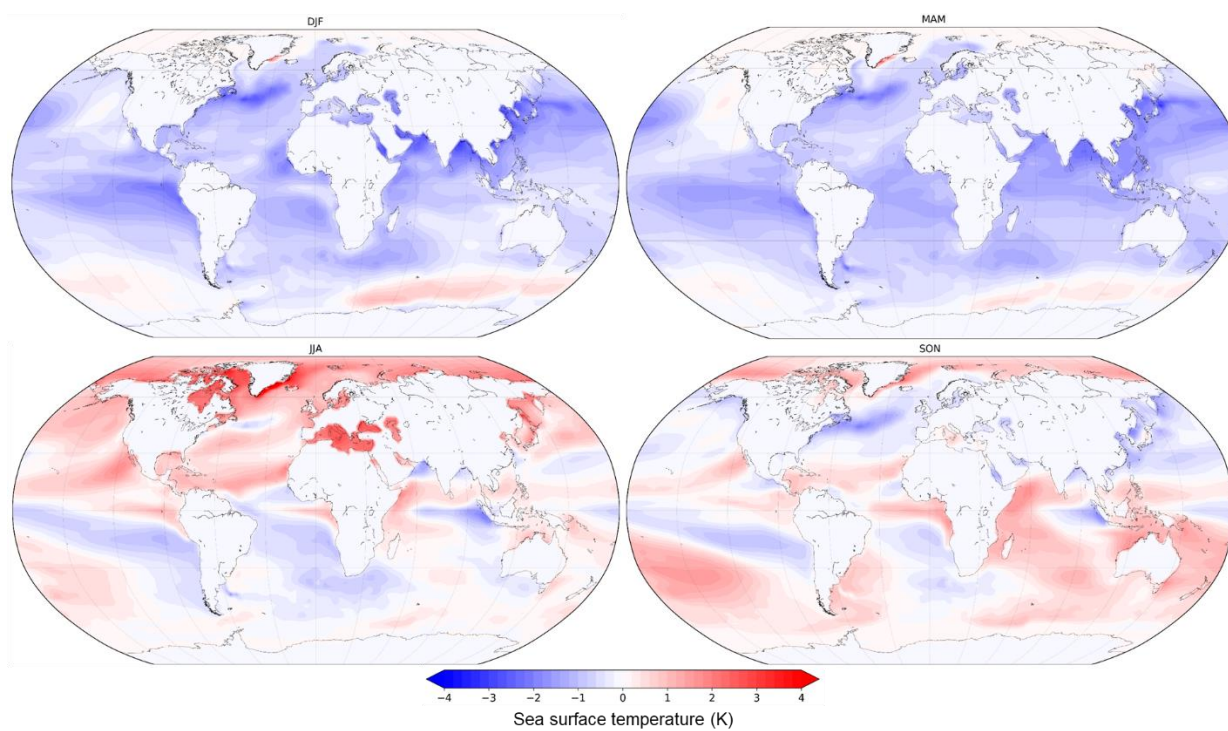

**Fig. S8. Anomaly (LIG-PI) in sea surface temperature.**
